# Supplementary material for: Navigating the transcriptional roadmap regulating plant secondary cell wall deposition
Source: Front Plant Sci. 2013 Aug 29;4:325. doi: 10.3389/fpls.2013.00325 (PMC3756741; doi:10.3389/fpls.2013.00325)
Supplement: Data sheet 1 — Excel spreadsheet of supporting literature for each protein-DNA and protein-protein interaction depicted in Additional file 1. [file DataSheet1.XLSX]

## Sheet: All interactions
Protein	Target gene	Type of interaction	Reference 1	Reference 2	Reference 3	Nature of interaction	Activation/repression
MYB63	TT8	Protein-protein	Bhargava et al. 2010. Plant Phys. 154(3):1428-1438
MYB75	4CL1	Protein-DNA	Bhargava et al. 2010. Plant Phys. 154(3):1428-1439			Unknown
MYB75	C3H	Protein-DNA	Bhargava et al. 2010. Plant Phys. 154(3):1428-1440			Unknown
MYB75	C4H	Protein-DNA	Bhargava et al. 2010. Plant Phys. 154(3):1428-1441			Unknown
MYB75	CCoAOMT	Protein-DNA	Bhargava et al. 2010. Plant Phys. 154(3):1428-1442			Unknown
MYB75	CesA4	Protein-DNA	Bhargava et al. 2010. Plant Phys. 154(3):1428-1443			Unknown
MYB75	CesA7	Protein-DNA	Bhargava et al. 2010. Plant Phys. 154(3):1428-1444			Unknown
MYB75	CesA8	Protein-DNA	Bhargava et al. 2010. Plant Phys. 154(3):1428-1445			Unknown
MYB75	F5H	Protein-DNA	Bhargava et al. 2010. Plant Phys. 154(3):1428-1446			Unknown
MYB75	HCT	Protein-DNA	Bhargava et al. 2010. Plant Phys. 154(3):1428-1447			Unknown
MYB75	IRX8	Protein-DNA	Bhargava et al. 2010. Plant Phys. 154(3):1428-1448			Unknown
MYB75	IRX9	Protein-DNA	Bhargava et al. 2010. Plant Phys. 154(3):1428-1449			Unknown
MYB75	KNAT7	Protein-protein	Bhargava et al. 2010. Plant Phys. 154(3):1428-1450
MYB75	PAL1	Protein-DNA	Bhargava et al. 2010. Plant Phys. 154(3):1428-1451			Unknown
MYB75	TT8	Protein-protein	Bhargava et al. 2010. Plant Phys. 154(3):1428-1452	Zimmerman et al. 2004. Plant J. 40:22–34	Bhargava et al. 2013. Planta 237:1199–1211
WEE1	VND7	?	Cools et al. 2011. Plant Cell 23:1435–1448			Unknown	Repressor
SND2	AGP21	Protein-DNA	Hussey et al. 2011. BMC Plant Biol. 11:173			Unknown	Activator
SND2	AGP4	Protein-DNA	Hussey et al. 2011. BMC Plant Biol. 11:173			Unknown	Activator
SND2	BGAL3	Protein-DNA	Hussey et al. 2011. BMC Plant Biol. 11:173			Unknown	Activator
SND2	CesA4	Protein-DNA	Hussey et al. 2011. BMC Plant Biol. 11:173			Unknown	Activator
SND2	CesA7	Protein-DNA	Hussey et al. 2011. BMC Plant Biol. 11:173			Unknown	Activator
SND2	COBL4	Protein-DNA	Hussey et al. 2011. BMC Plant Biol. 11:173			Unknown	Activator
SND2	CslA9	Protein-DNA	Hussey et al. 2011. BMC Plant Biol. 11:173			Unknown	Activator
SND2	CTL2	Protein-DNA	Hussey et al. 2011. BMC Plant Biol. 11:173			Unknown	Activator
SND2	EXPA15	Protein-DNA	Hussey et al. 2011. BMC Plant Biol. 11:173			Unknown	Activator
SND2	FLA13	Protein-DNA	Hussey et al. 2011. BMC Plant Biol. 11:173			Unknown	Activator
SND2	FLA15	Protein-DNA	Hussey et al. 2011. BMC Plant Biol. 11:173			Unknown	Activator
SND2	GH9B5	Protein-DNA	Hussey et al. 2011. BMC Plant Biol. 11:173			Unknown	Activator
SND2	GLP10	Protein-DNA	Hussey et al. 2011. BMC Plant Biol. 11:173			Unknown	Activator
SND2	IQD10	Protein-DNA	Hussey et al. 2011. BMC Plant Biol. 11:173			Unknown	Activator
SND2	IRX10	Protein-DNA	Hussey et al. 2011. BMC Plant Biol. 11:173			Unknown	Activator
SND2	IRX15	Protein-DNA	Hussey et al. 2011. BMC Plant Biol. 11:173			Unknown	Activator
SND2	IRX8	Protein-DNA	Hussey et al. 2011. BMC Plant Biol. 11:173			Unknown	Activator
SND2	MYB103	Protein-DNA	Hussey et al. 2011. BMC Plant Biol. 11:173			Unknown	Activator
SND2	PARVUS	Protein-DNA	Hussey et al. 2011. BMC Plant Biol. 11:173			Unknown	Activator
SND2	PGSIP1	Protein-DNA	Hussey et al. 2011. BMC Plant Biol. 11:173			Unknown	Activator
SND2	Rho GTPase	Protein-DNA	Hussey et al. 2011. BMC Plant Biol. 11:173			Unknown	Activator
SND2	RIC2	Protein-DNA	Hussey et al. 2011. BMC Plant Biol. 11:173			Unknown	Activator
SND2	TBL3	Protein-DNA	Hussey et al. 2011. BMC Plant Biol. 11:173			Unknown	Activator
SND2	UXS3	Protein-DNA	Hussey et al. 2011. BMC Plant Biol. 11:173			Unknown	Activator
MYB4	C4H	Protein-DNA	Jin et al. 2000. EMBO J. 19(22):1435–1448			Unknown	Repressor
MYB46	KNAT7	Protein-DNA	Kim et al unpublished data (as cited by Kim et al. 2012. Plant Mol Biol 78:489-501)			Direct	Activator
AGL35	CesA4	Protein-DNA	Kim et al. 2012. Plant J. 73:26–36			Direct	Activator
AGL56	CesA4	Protein-DNA	Kim et al. 2012. Plant J. 73:26–36			Direct	Activator
AGL85	CesA4	Protein-DNA	Kim et al. 2012. Plant J. 73:26–36			Direct	Activator
At5g07580	CesA4	Protein-DNA	Kim et al. 2012. Plant J. 73:26–36			Direct	Activator
ATHB17	CesA4	Protein-DNA	Kim et al. 2012. Plant J. 73:26–36			Direct	Activator
ERF5	CesA4	Protein-DNA	Kim et al. 2012. Plant J. 73:26–36			Direct	Activator
ERF6	CesA4	Protein-DNA	Kim et al. 2012. Plant J. 73:26–36			Direct	Activator
GATA22	CesA4	Protein-DNA	Kim et al. 2012. Plant J. 73:26–36			Direct	Activator
HSTF15	CesA4	Protein-DNA	Kim et al. 2012. Plant J. 73:26–36			Direct	Activator
IAA18	CesA4	Protein-DNA	Kim et al. 2012. Plant J. 73:26–36			Direct	Activator
MY112	CesA4	Protein-DNA	Kim et al. 2012. Plant J. 73:26–36			Direct	Activator
MYB46	CesA4	Protein-DNA	Kim et al. 2012. Plant J. 73:26–36			Direct	Activator
MYB46	CesA7	Protein-DNA	Kim et al. 2012. Plant J. 73:26–36			Direct	Activator
MYB46	CesA8	Protein-DNA	Kim et al. 2012. Plant J. 73:26–36			Direct	Activator
WRKY11	CesA4	Protein-DNA	Kim et al. 2012. Plant J. 73:26–36			Direct	Activator
ZAT7	CesA4	Protein-DNA	Kim et al. 2012. Plant J. 73:26–36			Direct	Activator
MYB-R	MYB54	Protein-DNA	Ko et al. 2009. Plant J 60:649–665			Unknown	Activator
C3H14	CesA4	Protein-DNA	Ko et al. 2009. Plant J 60:649–665			Unknown	Activator
C3H14	CesA7	Protein-DNA	Ko et al. 2009. Plant J 60:649–665			Unknown	Activator
C3H14	CesA8	Protein-DNA	Ko et al. 2009. Plant J 60:649–665			Unknown	Activator
C3H14	IRX8	Protein-DNA	Ko et al. 2009. Plant J 60:649–665			Unknown	Activator
C3H14	IRX9	Protein-DNA	Ko et al. 2009. Plant J 60:649–665			Unknown	Activator
C3H14	LAC10	Protein-DNA	Ko et al. 2009. Plant J 60:649–665			Unknown	Activator
C3H14	MYB32	Protein-DNA	Ko et al. 2009. Plant J 60:649–665			Unknown	Activator
C3H14	MYB52	Protein-DNA	Ko et al. 2009. Plant J 60:649–665			Unknown	Activator
C3H14	MYB63	Protein-DNA	Ko et al. 2009. Plant J 60:649–665			Unknown	Activator
C3H14	PAL4	Protein-DNA	Ko et al. 2009. Plant J 60:649–665			Unknown	Activator
MYB32	MYB32	Protein-DNA	Ko et al. 2009. Plant J 60:649–665			Unknown	Repressor
MYB32	MYB52	Protein-DNA	Ko et al. 2009. Plant J 60:649–665			Unknown	Repressor
MYB32	MYB7	Protein-DNA	Ko et al. 2009. Plant J 60:649–665			Unknown	Repressor
MYB4	MYB32	Protein-DNA	Ko et al. 2009. Plant J 60:649–665			Unknown	Repressor
MYB4	MYB4	Protein-DNA	Ko et al. 2009. Plant J 60:649–665			Unknown	Repressor
MYB4	MYB52	Protein-DNA	Ko et al. 2009. Plant J 60:649–665			Unknown	Repressor
MYB4	MYB7	Protein-DNA	Ko et al. 2009. Plant J 60:649–665			Unknown	Repressor
MYB46	C3H14	Protein-DNA	Ko et al. 2009. Plant J 60:649–665	Kim et al 2012. Plant Mol Biol 78:489–501	Zhong & Ye 2012. Plant & Cell Phys 53(2):368-380	Direct	Activator
MYB46	CCoAOMT1	Protein-DNA	Ko et al. 2009. Plant J 60:649–665	Zhong & Ye 2012. Plant & Cell Phys 53(2):368-380		Direct	Activator
MYB46	CesA4	Protein-DNA	Ko et al. 2009. Plant J 60:649–665			Unknown	Activator
MYB46	CesA7	Protein-DNA	Ko et al. 2009. Plant J 60:649–665			Unknown	Activator
MYB46	CesA8	Protein-DNA	Ko et al. 2009. Plant J 60:649–665			Unknown	Activator
MYB46	IRX8	Protein-DNA	Ko et al. 2009. Plant J 60:649–665			Unknown	Activator
MYB46	IRX9	Protein-DNA	Ko et al. 2009. Plant J 60:649–665			Unknown	Activator
MYB46	KNAT7	Protein-DNA	Ko et al. 2009. Plant J 60:649–665	Zhong & Ye 2012. Plant & Cell Phys 53(2):368-380		Direct	Activator
MYB46	LAC10	Protein-DNA	Ko et al. 2009. Plant J 60:649–665			Unknown	Activator
MYB46	MYB4	Protein-DNA	Ko et al. 2009. Plant J 60:649–665			Unknown	Activator
MYB46	MYB4	Protein-DNA	Ko et al. 2009. Plant J 60:649–665	Zhong & Ye 2012. Plant & Cell Phys 53(2):368-380		Direct	Activator
MYB46	MYB52	Protein-DNA	Ko et al. 2009. Plant J 60:649–665	Nakano et al. 2010. Plant Biotech. 27:267–272	Zhong & Ye 2012. Plant & Cell Phys 53(2):368-380	Direct	Activator
MYB46	MYB54	Protein-DNA	Ko et al. 2009. Plant J 60:649–665	Nakano et al. 2010. Plant Biotech. 27:267–272	Zhong & Ye 2012. Plant & Cell Phys 53(2):368-380	Direct	Activator
MYB46	MYB54	Protein-DNA	Ko et al. 2009. Plant J 60:649–665			Unknown	Activator
MYB46	MYB63	Protein-DNA	Ko et al. 2009. Plant J 60:649–665	Nakano et al. 2010. Plant Biotech. 27:267–272	Zhong & Ye 2012. Plant & Cell Phys 53(2):368-380	Direct	Activator
MYB46	MYB7	Protein-DNA	Ko et al. 2009. Plant J 60:649–665		Zhong & Ye 2012. Plant & Cell Phys 53(2):368-380	Direct	Activator
MYB46	MYB-R	Protein-DNA	Ko et al. 2009. Plant J 60:649–665			Unknown	Activator
MYB46	PAL4	Protein-DNA	Ko et al. 2009. Plant J 60:649–665			Unknown	Activator
MYB52	MYB52	Protein-DNA	Ko et al. 2009. Plant J 60:649–665			Unknown	Repressor
MYB63	ANAC075	Protein-DNA	Ko et al. 2009. Plant J 60:649–665			Unknown	Activator
MYB63	MYB4	Protein-DNA	Ko et al. 2009. Plant J 60:649–665			Unknown	Activator
MYB63	MYB54	Protein-DNA	Ko et al. 2009. Plant J 60:649–665			Unknown	Activator
MYB63	MYB7	Protein-DNA	Ko et al. 2009. Plant J 60:649–665			Unknown	Activator
MYB7	KNAT7	Protein-DNA	Ko et al. 2009. Plant J 60:649–665			Unknown	Repressor
MYB7	MYB4	Protein-DNA	Ko et al. 2009. Plant J 60:649–665			Unknown	Repressor
MYB7	MYB52	Protein-DNA	Ko et al. 2009. Plant J 60:649–665			Unknown	Repressor
MYB7	MYB54	Protein-DNA	Ko et al. 2009. Plant J 60:649–665			Unknown	Repressor
MYB7	MYB7	Protein-DNA	Ko et al. 2009. Plant J 60:649–665			Unknown	Repressor
SND1	C3H14	Protein-DNA	Ko et al. 2009. Plant J 60:649–665			Direct	Activator
SND1	CCoAOMT1	Protein-DNA	Ko et al. 2009. Plant J 60:649–665			Unknown	Activator
SND1	CesA4	Protein-DNA	Ko et al. 2009. Plant J 60:649–665			Unknown	Activator
SND1	CesA7	Protein-DNA	Ko et al. 2009. Plant J 60:649–665			Unknown	Activator
SND1	CesA8	Protein-DNA	Ko et al. 2009. Plant J 60:649–665			Unknown	Activator
SND1	IRX8	Protein-DNA	Ko et al. 2009. Plant J 60:649–665			Unknown	Activator
SND1	IRX9	Protein-DNA	Ko et al. 2009. Plant J 60:649–665	Lee et al. 2010. Plant Phys. 153:526–541		Unknown	Activator
SND1	LAC10	Protein-DNA	Ko et al. 2009. Plant J 60:649–665			Unknown	Activator
SND1	PAL4	Protein-DNA	Ko et al. 2009. Plant J 60:649–665			Unknown	Activator
SND1	IRX14	Protein-DNA	Lee et al. 2010. Plant Phys. 153:526–541			Unknown	Activator
SND1	IRX14-L	Protein-DNA	Lee et al. 2010. Plant Phys. 153:526–541			Unknown	Activator
SND1	IRX9-L	Protein-DNA	Lee et al. 2010. Plant Phys. 153:526–541			Unknown	Activator
SND1	GUX1	Protein-DNA	Lee et al 2012. Plant & Cell Phys. 53(7):1204-1216.			Unknown	Activator
SND1	GUX2	Protein-DNA	Lee et al 2012. Plant & Cell Phys. 53(7):1204-1216.			Unknown	Activator
SND1	GXM1	Protein-DNA	Lee et al. 2012. Plant & Cell Phys. 53(11):1934–1949			Unknown	Activator
SND1	GXM2	Protein-DNA	Lee et al. 2012. Plant & Cell Phys. 53(11):1934–1949			Unknown	Activator
SND1	GXM3	Protein-DNA	Lee et al. 2012. Plant & Cell Phys. 53(11):1934–1949			Unknown	Activator
SND1	IRX15	Protein-DNA	Lee et al. 2012. Plant & Cell Phys. 53(11):1934–1949			Unknown	Activator
SND1	IRX15-L	Protein-DNA	Lee et al. 2012. Plant & Cell Phys. 53(11):1934–1949			Unknown	Activator
KNAT7	OFP1	Protein-protein	Li et al. 2011. Plant J. 67:328–341				Repressor
KNAT7	OFP4	Protein-protein	Li et al. 2011. Plant J. 67:328–341				Repressor
KNAT7	4CL1	Protein-DNA	Li et al. 2012. New Phyt. 194(1):102–115			Unknown	Repressor
KNAT7	C3H1	Protein-DNA	Li et al. 2012. New Phyt. 194(1):102–115			Unknown	Repressor
KNAT7	C4H	Protein-DNA	Li et al. 2012. New Phyt. 194(1):102–115			Unknown	Repressor
KNAT7	CCoAOMT1	Protein-DNA	Li et al. 2012. New Phyt. 194(1):102–115			Unknown	Repressor
KNAT7	CCR1	Protein-DNA	Li et al. 2012. New Phyt. 194(1):102–115			Unknown	Repressor
KNAT7	CesA4	Protein-DNA	Li et al. 2012. New Phyt. 194(1):102–115			Unknown	Repressor
KNAT7	CesA7	Protein-DNA	Li et al. 2012. New Phyt. 194(1):102–115			Unknown	Repressor
KNAT7	CesA8	Protein-DNA	Li et al. 2012. New Phyt. 194(1):102–115			Unknown	Repressor
KNAT7	COMT	Protein-DNA	Li et al. 2012. New Phyt. 194(1):102–115			Unknown	Repressor
KNAT7	HCT	Protein-DNA	Li et al. 2012. New Phyt. 194(1):102–115			Unknown	Repressor
KNAT7	IRX7	Protein-DNA	Li et al. 2012. New Phyt. 194(1):102–115			Unknown	Repressor
KNAT7	IRX8	Protein-DNA	Li et al. 2012. New Phyt. 194(1):102–115			Unknown	Repressor
KNAT7	IRX9	Protein-DNA	Li et al. 2012. New Phyt. 194(1):102–115			Unknown	Repressor
KNAT7	PAL1	Protein-DNA	Li et al. 2012. New Phyt. 194(1):102–115			Unknown	Repressor
MYB46	4CL1	Protein-DNA	McCarthy et al. 2009. Plant Cell Physiol. 50(11): 1950–1964			Unknown	Activator
MYB46	CesA4	Protein-DNA	McCarthy et al. 2009. Plant Cell Physiol. 50(11): 1950–1964			Unknown	Activator
MYB46	CesA7	Protein-DNA	McCarthy et al. 2009. Plant Cell Physiol. 50(11): 1950–1964			Unknown	Activator
MYB46	CesA8	Protein-DNA	McCarthy et al. 2009. Plant Cell Physiol. 50(11): 1950–1964			Unknown	Activator
MYB46	FRA8	Protein-DNA	McCarthy et al. 2009. Plant Cell Physiol. 50(11): 1950–1964			Unknown	Activator
MYB46	IRX8	Protein-DNA	McCarthy et al. 2009. Plant Cell Physiol. 50(11): 1950–1964			Unknown	Activator
MYB46	IRX9	Protein-DNA	McCarthy et al. 2009. Plant Cell Physiol. 50(11): 1950–1964			Unknown	Activator
MYB46	MYB42	Protein-DNA	McCarthy et al. 2009. Plant Cell Physiol. 50(11): 1950–1964			Unknown	Activator
MYB46	MYB43	Protein-DNA	McCarthy et al. 2009. Plant Cell Physiol. 50(11): 1950–1964			Unknown	Activator
MYB46	SND3	Protein-DNA	McCarthy et al. 2009. Plant Cell Physiol. 50(11): 1950–1964			Unknown	Activator
MYB46	MYB103	Protein-DNA	McCarthy et al. 2009. Plant Cell Physiol. 50(11): 1950–1964	Nakano et al. 2010. Plant Biotech. 27:267–272		Unknown	Activator
MYB46	MYB85	Protein-DNA	McCarthy et al. 2009. Plant Cell Physiol. 50(11): 1950–1964			Unknown	Activator
MYB83	4CL1	Protein-DNA	McCarthy et al. 2009. Plant Cell Physiol. 50(11): 1950–1964			Unknown	Activator
MYB83	CesA4	Protein-DNA	McCarthy et al. 2009. Plant Cell Physiol. 50(11): 1950–1964			Unknown	Activator
MYB83	CesA7	Protein-DNA	McCarthy et al. 2009. Plant Cell Physiol. 50(11): 1950–1964			Unknown	Activator
MYB83	CesA8	Protein-DNA	McCarthy et al. 2009. Plant Cell Physiol. 50(11): 1950–1964			Unknown	Activator
MYB83	FRA8	Protein-DNA	McCarthy et al. 2009. Plant Cell Physiol. 50(11): 1950–1964			Unknown	Activator
MYB83	IRX8	Protein-DNA	McCarthy et al. 2009. Plant Cell Physiol. 50(11): 1950–1964			Unknown	Activator
MYB83	IRX9	Protein-DNA	McCarthy et al. 2009. Plant Cell Physiol. 50(11): 1950–1964			Unknown	Activator
MYB83	MYB42	Protein-DNA	McCarthy et al. 2009. Plant Cell Physiol. 50(11): 1950–1964			Unknown	Activator
MYB83	MYB43	Protein-DNA	McCarthy et al. 2009. Plant Cell Physiol. 50(11): 1950–1964			Unknown	Activator
MYB83	SND3	Protein-DNA	McCarthy et al. 2009. Plant Cell Physiol. 50(11): 1950–1964			Unknown	Activator
MYB83	MYB103	Protein-DNA	McCarthy et al. 2009. Plant Cell Physiol. 50(11): 1950–1964	Nakano et al. 2010. Plant Biotech. 27:267–272		Unknown	Activator
MYB83	MYB85	Protein-DNA	McCarthy et al. 2009. Plant Cell Physiol. 50(11): 1950–1964			Unknown	Activator
NST1	MYB83	Protein-DNA	McCarthy et al. 2009. Plant Cell Physiol. 50(11): 1950–1964			Direct	Activator
NST2	MYB83	Protein-DNA	McCarthy et al. 2009. Plant Cell Physiol. 50(11): 1950–1964			Direct	Activator
SND1	MYB83	Protein-DNA	McCarthy et al. 2009. Plant Cell Physiol. 50(11): 1950–1964			Direct	Activator
VND6	MYB83	Protein-DNA	McCarthy et al. 2009. Plant Cell Physiol. 50(11): 1950–1964			Direct	Activator
VND7	MYB83	Protein-DNA	McCarthy et al. 2009. Plant Cell Physiol. 50(11): 1950–1964			Direct	Activator
BP	4CL1	Protein-DNA	Mele et al. 2003. Genes & Dev. 17:2088–2093			Unknown	Repressor
BP	C4H	Protein-DNA	Mele et al. 2003. Genes & Dev. 17:2088–2093			Unknown	Repressor
BP	CCoAOMT1	Protein-DNA	Mele et al. 2003. Genes & Dev. 17:2088–2093			Direct	Repressor
BP	COMT1	Protein-DNA	Mele et al. 2003. Genes & Dev. 17:2088–2093			Direct	Repressor
BP	PAL	Protein-DNA	Mele et al. 2003. Genes & Dev. 17:2088–2093			Unknown	Repressor
NST1	MYB26	Protein-DNA	Mitsuda et al. 2005. Plant Cell. 17:2993–3006			Unknown	Activator
At3g46080	CCoAOMT1	Protein-DNA	Mitsuda et al. 2010. Plant & Cell Phys. 51(12):2145–2151			Direct	Unknown
ATHB18	CCoAOMT1	Protein-DNA	Mitsuda et al. 2010. Plant & Cell Phys. 51(12):2145–2152			Direct	Unknown
MYB58	CCoAOMT	Protein-DNA	Mitsuda et al. 2010. Plant & Cell Phys. 51(12):2145–2153			Direct	Unknown
MYB69	CCoAOMT	Protein-DNA	Mitsuda et al. 2010. Plant & Cell Phys. 51(12):2145–2154			Direct	Unknown
MYB79	CCoAOMT1	Protein-DNA	Mitsuda et al. 2010. Plant & Cell Phys. 51(12):2145–2155			Direct	Unknown
GL1	MYB103	Protein-DNA	Morohashi & Grotewold 2009. PLoS Genet. 5(2): e1000396			Unknown	Activator
MYB46	MYB103	Protein-DNA	Nakano et al. 2010. Plant Biotech. 27:267–272			Unknown	Activator
MYB46	MYB85	Protein-DNA	Nakano et al. 2010. Plant Biotech. 27:267–272			Unknown	Activator
VND6	XCP1	Protein-DNA	Ohashi-Ito et al. 2010. Plant Cell 22:3461–3473			Direct	Activator
VND6	XCP2	Protein-DNA	Ohashi-Ito et al. 2010. Plant Cell 22:3461–3474			Direct	Activator
VND6	SBT1.1	Protein-DNA	Ohashi-Ito et al. 2010. Plant Cell 22:3461–3475			Direct	Activator
VND6	MC9	Protein-DNA	Ohashi-Ito et al. 2010. Plant Cell 22:3461–3475			Direct	Activator
MYB63	CCR1	Protein-DNA	Öhman et al. 2012. Plant J. 73(1):63–100			Unknown	Activator
MYB63	COMT	Protein-DNA	Öhman et al. 2012. Plant J. 73(1):63–101			Unknown	Activator
MYB63	HCT	Protein-DNA	Öhman et al. 2012. Plant J. 73(1):63–102			Unknown	Activator
MYB63	PAL1	Protein-DNA	Öhman et al. 2012. Plant J. 73(1):63–103			Unknown	Activator
MYB69	C3H1	Protein-DNA	Öhman et al. 2012. Plant J. 73(1):63–104			Unknown	Activator
MYB69	CCoAOMT1	Protein-DNA	Öhman et al. 2012. Plant J. 73(1):63–105			Unknown	Repressor
MYB69	CHS	Protein-DNA	Öhman et al. 2012. Plant J. 73(1):63–106			Unknown	Repressor
MYB69	F5H	Protein-DNA	Öhman et al. 2012. Plant J. 73(1):63–107			Unknown	Repressor
MYB69	HCT	Protein-DNA	Öhman et al. 2012. Plant J. 73(1):63–108			Unknown	Repressor
MYB69	PAL1	Protein-DNA	Öhman et al. 2012. Plant J. 73(1):63–109			Unknown	Repressor
SND2	4CL1	Protein-DNA	Öhman et al. 2012. Plant J. 73(1):63–110			Unknown	Repressor
SND2	C3H1	Protein-DNA	Öhman et al. 2012. Plant J. 73(1):63–111			Unknown	Repressor
SND2	CAD6	Protein-DNA	Öhman et al. 2012. Plant J. 73(1):63–112			Unknown	Repressor
SND2	CHS	Protein-DNA	Öhman et al. 2012. Plant J. 73(1):63–113			Unknown	Repressor
SND2	F5H	Protein-DNA	Öhman et al. 2012. Plant J. 73(1):63–114			Unknown	Activator
SND2	PAL1	Protein-DNA	Öhman et al. 2012. Plant J. 73(1):63–115			Unknown	Repressor
SND3	4CL1	Protein-DNA	Öhman et al. 2012. Plant J. 73(1):63–116			Unknown	Repressor
SND3	CAD6	Protein-DNA	Öhman et al. 2012. Plant J. 73(1):63–117			Unknown	Repressor
SND3	CHS	Protein-DNA	Öhman et al. 2012. Plant J. 73(1):63–118			Unknown	Repressor
SND3	PAL1	Protein-DNA	Öhman et al. 2012. Plant J. 73(1):63–119			Unknown	Repressor
MYB103	4CL1	Protein-DNA	Öhman et al. 2012. Plant J. 73(1):63–76			Unknown	Activator
MYB103	CCoAOMT	Protein-DNA	Öhman et al. 2012. Plant J. 73(1):63–77			Unknown	Repressor
MYB103	CslA9	Protein-DNA	Öhman et al. 2012. Plant J. 73(1):63–78			Unknown	Activator
MYB103	F5H	Protein-DNA	Öhman et al. 2012. Plant J. 73(1):63–79			Indirect	Activator
MYB103	HCT	Protein-DNA	Öhman et al. 2012. Plant J. 73(1):63–80			Unknown	Repressor
MYB103	IQD10	Protein-DNA	Öhman et al. 2012. Plant J. 73(1):63–81			Unknown	Activator
MYB103	LAC17	Protein-DNA	Öhman et al. 2012. Plant J. 73(1):63–82			Unknown	Activator
MYB103	MYB20	Protein-DNA	Öhman et al. 2012. Plant J. 73(1):63–83			Unknown	Activator
MYB103	MYB63	Protein-DNA	Öhman et al. 2012. Plant J. 73(1):63–84			Unknown	Activator
MYB103	MYB69	Protein-DNA	Öhman et al. 2012. Plant J. 73(1):63–85			Unknown	Activator
MYB103	RAC GTPase	Protein-DNA	Öhman et al. 2012. Plant J. 73(1):63–86			Unknown	Activator
MYB103	SND2	Protein-DNA	Öhman et al. 2012. Plant J. 73(1):63–87			Unknown	Activator
MYB103	SND3	Protein-DNA	Öhman et al. 2012. Plant J. 73(1):63–88			Unknown	Activator
MYB20	4CL1	Protein-DNA	Öhman et al. 2012. Plant J. 73(1):63–89			Unknown	Activator
MYB20	C3H1	Protein-DNA	Öhman et al. 2012. Plant J. 73(1):63–90			Unknown	Activator
MYB20	C4H	Protein-DNA	Öhman et al. 2012. Plant J. 73(1):63–91			Unknown	Activator
MYB20	CCoAOMT1	Protein-DNA	Öhman et al. 2012. Plant J. 73(1):63–92			Unknown	Activator
MYB20	CCR1	Protein-DNA	Öhman et al. 2012. Plant J. 73(1):63–93			Unknown	Activator
MYB20	CHS	Protein-DNA	Öhman et al. 2012. Plant J. 73(1):63–94			Unknown	Activator
MYB20	HCT	Protein-DNA	Öhman et al. 2012. Plant J. 73(1):63–95			Unknown	Activator
MYB20	PAL1	Protein-DNA	Öhman et al. 2012. Plant J. 73(1):63–96			Unknown	Activator
MYB63	C3H1	Protein-DNA	Öhman et al. 2012. Plant J. 73(1):63–97			Unknown	Activator
MYB63	C4H	Protein-DNA	Öhman et al. 2012. Plant J. 73(1):63–98			Unknown	Activator
MYB63	CCoAOMT1	Protein-DNA	Öhman et al. 2012. Plant J. 73(1):63–99			Unknown	Activator
WAT1	NST1	?	Ranocha et al. 2010. Plant J. 63:469–483			Unknown	Activator
WAT1	NST2	?	Ranocha et al. 2010. Plant J. 63:469–483			Unknown	Activator
WAT1	SND1	?	Ranocha et al. 2010. Plant J. 63:469–483			Unknown	Activator
MYB61	CCoAOMT7	Protein-DNA	Romano et al. 2012. New Phyt. 195:774-786			Direct	Activator
MYB61	KNAT7	Protein-DNA	Romano et al. 2012. New Phyt. 195:774-786			Direct	Activator
MYB61	PME At2g45220	Protein-DNA	Romano et al. 2012. New Phyt. 195:774-786			Direct	Activator
ASL19/20	VND6	Protein-DNA	Soyano et al. 2008. Plant Cell. 20:3359–3373			Unknown	Activator
ASL19/20	VND7	Protein-DNA	Soyano et al. 2008. Plant Cell. 20:3359–3373			Unknown	Activator
VND6	ASL19/20	Protein-DNA	Soyano et al. 2008. Plant Cell. 20:3359–3373			Unknown	Activator
VND7	ASL19/20	Protein-DNA	Soyano et al. 2008. Plant Cell. 20:3359–3373	Yamaguchi et al. 2011. Plant J. 66:579–590		Direct	Activator
WRKY12	C3H14	Protein-DNA	Wang et al. 2010. PNAS 107(51):22338–22343			Unknown	Repressor
WRKY12	C3H14L	Protein-DNA	Wang et al. 2010. PNAS 107(51):22338–22343			Unknown	Repressor
WRKY12	NST2	Protein-DNA	Wang et al. 2010. PNAS 107(51):22338–22343			Direct	Repressor
MYB32	SND1	Protein-DNA	Wang et al. 2011. Plant J. 68(6):1104–1114			Unknown	Repressor
SND1	MYB32	Protein-DNA	Wang et al. 2011. Plant J. 68(6):1104–1114			Direct	Activator
SND1	SND1	Protein-DNA	Wang et al. 2011. Plant J. 68(6):1104–1114			Direct	Activator
BES1	CesA1	Protein-DNA	Xie et al. 2011. J. Exp.Bot. 62(13):4495-4506			Direct	Activator
BES1	CesA10	Protein-DNA	Xie et al. 2011. J. Exp.Bot. 62(13):4495-4507			Direct	Activator
BES1	CesA2	Protein-DNA	Xie et al. 2011. J. Exp.Bot. 62(13):4495-4508			Direct	Activator
BES1	CesA3	Protein-DNA	Xie et al. 2011. J. Exp.Bot. 62(13):4495-4509			Direct	Activator
BES1	CesA4	Protein-DNA	Xie et al. 2011. J. Exp.Bot. 62(13):4495-4510			Direct	Activator
BES1	CesA5	Protein-DNA	Xie et al. 2011. J. Exp.Bot. 62(13):4495-4511			Direct	Activator
BES1	CesA6	Protein-DNA	Xie et al. 2011. J. Exp.Bot. 62(13):4495-4512			Direct	Activator
BES1	CesA8	Protein-DNA	Xie et al. 2011. J. Exp.Bot. 62(13):4495-4513			Direct	Activator
BES1	CesA9	Protein-DNA	Xie et al. 2011. J. Exp.Bot. 62(13):4495-4514			Direct	Activator
VND6	VND6	Protein-protein	Yamaguchi et al. 2008. Plant J. 55:652-664			Unknown	Activator
VND7	VND1	Protein-protein	Yamaguchi et al. 2008. Plant J. 55:652-664			Unknown	Activator
VND7	VND2	Protein-protein	Yamaguchi et al. 2008. Plant J. 55:652-664			Unknown	Activator
VND7	VND3	Protein-protein	Yamaguchi et al. 2008. Plant J. 55:652-664			Unknown	Activator
VND7	VNI2	Protein-protein	Yamaguchi et al. 2010. Plant Cell 22(4):1249-1263
VNI2	ASL19	Protein-DNA	Yamaguchi et al. 2010. Plant Cell 22(4):1249-1263			Unknown	Repressor
VNI2	MYB46	Protein-DNA	Yamaguchi et al. 2010. Plant Cell 22(4):1249-1263			Unknown	Repressor
VNI2	VND1	Protein-protein	Yamaguchi et al. 2010. Plant Cell 22(4):1249-1263
VNI2	VND2	Protein-protein	Yamaguchi et al. 2010. Plant Cell 22(4):1249-1263
VNI2	VND3	Protein-protein	Yamaguchi et al. 2010. Plant Cell 22(4):1249-1263
VNI2	VND4	Protein-protein	Yamaguchi et al. 2010. Plant Cell 22(4):1249-1263
VNI2	VND5	Protein-protein	Yamaguchi et al. 2010. Plant Cell 22(4):1249-1263
VND7	ARAC2	Protein-DNA	Yamaguchi et al. 2011. Plant J. 66:579–590			Direct	Activator
VND7	ASL11	Protein-DNA	Yamaguchi et al. 2011. Plant J. 66:579–590			Direct	Activator
VND7	CesA4	Protein-DNA	Yamaguchi et al. 2011. Plant J. 66:579–590			Direct	Activator
VND7	CesA8	Protein-DNA	Yamaguchi et al. 2011. Plant J. 66:579–590			Direct	Activator
VND7	FLA11	Protein-DNA	Yamaguchi et al. 2011. Plant J. 66:579–590			Direct	Activator
VND7	GLP10	Protein-DNA	Yamaguchi et al. 2011. Plant J. 66:579–590			Direct	Activator
VND7	LAC4	Protein-DNA	Yamaguchi et al. 2011. Plant J. 66:579–590			Direct	Activator
VND7	PGSIP3	Protein-DNA	Yamaguchi et al. 2011. Plant J. 66:579–590			Direct	Activator
VND7	RAC GTPase	Protein-DNA	Yamaguchi et al. 2011. Plant J. 66:579–590			Direct	Activator
VND7	RIP4	Protein-DNA	Yamaguchi et al. 2011. Plant J. 66:579–590			Direct	Activator
VND7	SCPL48	Protein-DNA	Yamaguchi et al. 2011. Plant J. 66:579–590			Direct	Activator
VND7	Xyn3	Protein-DNA	Yamaguchi et al. 2011. Plant J. 66:579–590			Direct	Activator
VND7	SBT1.1	Protein-DNA	Yamaguchi et al. 2011. Plant J. 66:579–590			Direct	Activator
MYB26	NST1	Protein-DNA	Yang et al. 2007. Plant Cell. 19:534–548			Unknown	Activator
MYB26	NST2	Protein-DNA	Yang et al. 2007. Plant Cell. 19:534–548			Unknown	Activator
MYB46	4CL3	Protein-DNA	Zhong & Ye 2012. Plant & Cell Phys 53(2):368-380			Direct	Activator
MYB46	CAD4	Protein-DNA	Zhong & Ye 2012. Plant & Cell Phys 53(2):368-380			Direct	Activator
MYB46	CP1	Protein-DNA	Zhong & Ye 2012. Plant & Cell Phys 53(2):368-380			Direct	Activator
MYB46	IRX14-L	Protein-DNA	Zhong & Ye 2012. Plant & Cell Phys 53(2):368-380			Direct	Activator
MYB46	MYB32	Protein-DNA	Zhong & Ye 2012. Plant & Cell Phys 53(2):368-380	Ko et al. 2009. Plant J 60:649–665		Direct	Activator
MYB46	MYB6	Protein-DNA	Zhong & Ye 2012. Plant & Cell Phys 53(2):368-380			Direct	Activator
MYB46	PAL1	Protein-DNA	Zhong & Ye 2012. Plant & Cell Phys 53(2):368-380			Direct	Activator
MYB46	ROP1	Protein-DNA	Zhong & Ye 2012. Plant & Cell Phys 53(2):368-380			Direct	Activator
MYB46	ROP2	Protein-DNA	Zhong & Ye 2012. Plant & Cell Phys 53(2):368-380			Direct	Activator
MYB46	ROP4	Protein-DNA	Zhong & Ye 2012. Plant & Cell Phys 53(2):368-380			Direct	Activator
MYB46	SCPL29	Protein-DNA	Zhong & Ye 2012. Plant & Cell Phys 53(2):368-380			Direct	Activator
MYB46	SCPL48	Protein-DNA	Zhong & Ye 2012. Plant & Cell Phys 53(2):368-380			Direct	Activator
MYB46	UXS3	Protein-DNA	Zhong & Ye 2012. Plant & Cell Phys 53(2):368-380			Direct	Activator
MYB46	BEL10	Protein-DNA	Zhong & Ye 2012. Plant & Cell Phys 53(2):368-380			Direct	Activation
MYB46	bZIP6	Protein-DNA	Zhong & Ye 2012. Plant & Cell Phys 53(2):368-380			Direct	Activation
MYB46	TRY	Protein-DNA	Zhong & Ye 2012. Plant & Cell Phys 53(2):368-380			Direct	Activation
MYB46	IAA28	Protein-DNA	Zhong & Ye 2012. Plant & Cell Phys 53(2):368-380			Direct	Activation
MYB46	BLH6	Protein-DNA	Zhong & Ye 2012. Plant & Cell Phys 53(2):368-380			Direct	Activation
MYB46	BLH3	Protein-DNA	Zhong & Ye 2012. Plant & Cell Phys 53(2):368-380			Direct	Activation
MYB46	BLH2	Protein-DNA	Zhong & Ye 2012. Plant & Cell Phys 53(2):368-380			Direct	Activation
MYB46	ZAT5	Protein-DNA	Zhong & Ye 2012. Plant & Cell Phys 53(2):368-380			Direct	Activation
MYB83	4CL3	Protein-DNA	Zhong & Ye 2012. Plant & Cell Phys 53(2):368-380			Direct	Activator
MYB83	C3H14	Protein-DNA	Zhong & Ye 2012. Plant & Cell Phys 53(2):368-380			Direct	Activator
MYB83	CAD4	Protein-DNA	Zhong & Ye 2012. Plant & Cell Phys 53(2):368-380			Direct	Activator
MYB83	CCoAOMT1	Protein-DNA	Zhong & Ye 2012. Plant & Cell Phys 53(2):368-380	McCarthy et al. 2009. Plant Cell Physiol. 50(11): 1950–1964		Direct	Activator
MYB83	IRX14-L	Protein-DNA	Zhong & Ye 2012. Plant & Cell Phys 53(2):368-380			Direct	Activator
MYB83	KNAT7	Protein-DNA	Zhong & Ye 2012. Plant & Cell Phys 53(2):368-380	McCarthy et al. 2009. Plant Cell Physiol. 50(11): 1950–1964		Direct	Activator
MYB83	MYB32	Protein-DNA	Zhong & Ye 2012. Plant & Cell Phys 53(2):368-380			Direct	Activator
MYB83	MYB4	Protein-DNA	Zhong & Ye 2012. Plant & Cell Phys 53(2):368-380			Direct	Activator
MYB83	MYB52	Protein-DNA	Zhong & Ye 2012. Plant & Cell Phys 53(2):368-380	McCarthy et al. 2009. Plant Cell Physiol. 50(11): 1950–1964; Nakano et al. 2010. Plant Biotech. 27:267–272		Direct	Activator
MYB83	MYB54	Protein-DNA	Zhong & Ye 2012. Plant & Cell Phys 53(2):368-380	McCarthy et al. 2009. Plant Cell Physiol. 50(11): 1950–1964		Direct	Activator
MYB83	MYB58	Protein-DNA	Zhong & Ye 2012. Plant & Cell Phys 53(2):368-380	McCarthy et al. 2009. Plant Cell Physiol. 50(11): 1950–1964		Direct	Activator
MYB83	MYB6	Protein-DNA	Zhong & Ye 2012. Plant & Cell Phys 53(2):368-380			Direct	Activator
MYB83	MYB63	Protein-DNA	Zhong & Ye 2012. Plant & Cell Phys 53(2):368-380	McCarthy et al. 2009. Plant Cell Physiol. 50(11): 1950–1964	Nakano et al. 2010. Plant Biotech. 27:267–272	Direct	Activator
MYB83	MYB7	Protein-DNA	Zhong & Ye 2012. Plant & Cell Phys 53(2):368-380			Direct	Activator
MYB83	PAL1	Protein-DNA	Zhong & Ye 2012. Plant & Cell Phys 53(2):368-380			Direct	Activator
MYB83	PAL4	Protein-DNA	Zhong & Ye 2012. Plant & Cell Phys 53(2):368-380			Direct	Activator
MYB83	ROP1	Protein-DNA	Zhong & Ye 2012. Plant & Cell Phys 53(2):368-380			Direct	Activator
MYB83	ROP2	Protein-DNA	Zhong & Ye 2012. Plant & Cell Phys 53(2):368-380			Direct	Activator
MYB83	ROP4	Protein-DNA	Zhong & Ye 2012. Plant & Cell Phys 53(2):368-380			Direct	Activator
MYB83	UXS3	Protein-DNA	Zhong & Ye 2012. Plant & Cell Phys 53(2):368-380			Direct	Activator
MYB83	BEL10	Protein-DNA	Zhong & Ye 2012. Plant & Cell Phys 53(2):368-380			Direct	Activation
MYB83	bZIP6	Protein-DNA	Zhong & Ye 2012. Plant & Cell Phys 53(2):368-380			Direct	Activation
MYB83	TRY	Protein-DNA	Zhong & Ye 2012. Plant & Cell Phys 53(2):368-380			Direct	Activation
MYB83	IAA28	Protein-DNA	Zhong & Ye 2012. Plant & Cell Phys 53(2):368-380			Direct	Activation
MYB83	BLH6	Protein-DNA	Zhong & Ye 2012. Plant & Cell Phys 53(2):368-380			Direct	Activation
MYB83	BLH3	Protein-DNA	Zhong & Ye 2012. Plant & Cell Phys 53(2):368-380			Direct	Activation
MYB83	BLH2	Protein-DNA	Zhong & Ye 2012. Plant & Cell Phys 53(2):368-380			Direct	Activation
MYB83	ZAT5	Protein-DNA	Zhong & Ye 2012. Plant & Cell Phys 53(2):368-380			Direct	Activation
MYB103	CesA8	Protein-DNA	Zhong et al. 2008. Plant Cell. 20:2763–2782			Unknown	Activator
MYB52	4CL1	Protein-DNA	Zhong et al. 2008. Plant Cell. 20:2763–2782			Unknown	Activator
MYB52	CesA8	Protein-DNA	Zhong et al. 2008. Plant Cell. 20:2763–2782			Unknown	Activator
MYB52	IRX9	Protein-DNA	Zhong et al. 2008. Plant Cell. 20:2763–2782			Unknown	Activator
MYB54	4CL1	Protein-DNA	Zhong et al. 2008. Plant Cell. 20:2763–2782			Unknown	Activator
MYB54	CesA8	Protein-DNA	Zhong et al. 2008. Plant Cell. 20:2763–2782			Unknown	Activator
MYB54	IRX9	Protein-DNA	Zhong et al. 2008. Plant Cell. 20:2763–2782			Unknown	Activator
MYB85	4CL1	Protein-DNA	Zhong et al. 2008. Plant Cell. 20:2763–2782			Unknown	Activator
NST1	KNAT7	Protein-DNA	Zhong et al. 2008. Plant Cell. 20:2763–2782			Direct	Activator
NST1	MYB103	Protein-DNA	Zhong et al. 2008. Plant Cell. 20:2763–2782			Direct	Activator
NST1	MYB46	Protein-DNA	Zhong et al. 2008. Plant Cell. 20:2763–2782			Direct	Activator
NST1	SND3	Protein-DNA	Zhong et al. 2008. Plant Cell. 20:2763–2782			Indirect	Activator
NST2	KNAT7	Protein-DNA	Zhong et al. 2008. Plant Cell. 20:2763–2782			Direct	Activator
NST2	MYB103	Protein-DNA	Zhong et al. 2008. Plant Cell. 20:2763–2782			Direct	Activator
NST2	MYB46	Protein-DNA	Zhong et al. 2008. Plant Cell. 20:2763–2782			Direct	Activator
NST2	SND3	Protein-DNA	Zhong et al. 2008. Plant Cell. 20:2763–2782			Direct	Activator
SND1	KNAT7	Protein-DNA	Zhong et al. 2008. Plant Cell. 20:2763–2782			Direct	Activator
SND1	MYB103	Protein-DNA	Zhong et al. 2008. Plant Cell. 20:2763–2782			Direct	Activator
SND1	MYB20	Protein-DNA	Zhong et al. 2008. Plant Cell. 20:2763–2782			Indirect	Activator
SND1	MYB42	Protein-DNA	Zhong et al. 2008. Plant Cell. 20:2763–2782			Indirect	Activator
SND1	MYB43	Protein-DNA	Zhong et al. 2008. Plant Cell. 20:2763–2782			Indirect	Activator
SND1	MYB46	Protein-DNA	Zhong et al. 2008. Plant Cell. 20:2763–2782			Direct	Activator
SND1	MYB52	Protein-DNA	Zhong et al. 2008. Plant Cell. 20:2763–2782	Ko et al. 2009. Plant J 60:649–665		Indirect	Activator
SND1	MYB54	Protein-DNA	Zhong et al. 2008. Plant Cell. 20:2763–2782			Indirect	Activator
SND1	MYB69	Protein-DNA	Zhong et al. 2008. Plant Cell. 20:2763–2782			Indirect	Activator
SND1	SND2	Protein-DNA	Zhong et al. 2008. Plant Cell. 20:2763–2782			Indirect	Activator
SND1	SND3	Protein-DNA	Zhong et al. 2008. Plant Cell. 20:2763–2782			Direct	Activator
SND2	CesA8	Protein-DNA	Zhong et al. 2008. Plant Cell. 20:2763–2782			Unknown	Activator
SND3	CesA8	Protein-DNA	Zhong et al. 2008. Plant Cell. 20:2763–2782			Unknown	Activator
VND6	KNAT7	Protein-DNA	Zhong et al. 2008. Plant Cell. 20:2763–2782			Direct	Activator
VND6	MYB103	Protein-DNA	Zhong et al. 2008. Plant Cell. 20:2763–2782			Direct	Activator
VND6	MYB46	Protein-DNA	Zhong et al. 2008. Plant Cell. 20:2763–2782			Direct	Activator
VND6	SND3	Protein-DNA	Zhong et al. 2008. Plant Cell. 20:2763–2782			Direct	Activator
VND7	KNAT7	Protein-DNA	Zhong et al. 2008. Plant Cell. 20:2763–2782			Direct	Activator
VND7	MYB103	Protein-DNA	Zhong et al. 2008. Plant Cell. 20:2763–2782			Direct	Activator
VND7	MYB46	Protein-DNA	Zhong et al. 2008. Plant Cell. 20:2763–2782	Yamaguchi et al. 2011. Plant J. 66:579–590		Direct	Activator
VND7	SND3	Protein-DNA	Zhong et al. 2008. Plant Cell. 20:2763–2782			Direct	Activator
SND1	XTH10	Protein-DNA	Zhong et al. 2010. Molecular plant 3(6):1087-1103			Direct	Activator
SND1	ANAC103	Protein-DNA	Zhong et al. 2010. Molecular plant 3(6):1087-1103			Direct	Activator
SND1	CslB1	Protein-DNA	Zhong et al. 2010. Molecular plant 3(6):1087-1103			Direct	Activator
SND1	CslB2	Protein-DNA	Zhong et al. 2010. Molecular plant 3(6):1087-1103			Direct	Activator
SND1	CTL2	Protein-DNA	Zhong et al. 2010. Molecular plant 3(6):1087-1103			Direct	Activator
SND1	GUS3	Protein-DNA	Zhong et al. 2010. Molecular plant 3(6):1087-1103			Direct	Activator
SND1	IRX10	Protein-DNA	Zhong et al. 2010. Molecular plant 3(6):1087-1103			Direct	Activator
SND1	IRX14-L	Protein-DNA	Zhong et al. 2010. Molecular plant 3(6):1087-1103			Direct	Activator
SND1	PARVUS	Protein-DNA	Zhong et al. 2010. Molecular plant 3(6):1087-1103			Direct	Activator
SND1	SCPL20	Protein-DNA	Zhong et al. 2010. Molecular plant 3(6):1087-1103	Yamaguchi et al. 2011. Plant J. 66:579–590		Direct	Activator
SND1	UXS3	Protein-DNA	Zhong et al. 2010. Molecular plant 3(6):1087-1103			Direct	Activator
SND1	UXS6	Protein-DNA	Zhong et al. 2010. Molecular plant 3(6):1087-1103			Direct	Activator
SND1	XND1	Protein-DNA	Zhong et al. 2010. Molecular plant 3(6):1087-1103			Direct	Activator
SND1	XCP1	Protein-DNA	Zhong et al. 2010. Molecular plant 3(6):1087-1103			Direct	Activator
SND1	XCP2	Protein-DNA	Zhong et al. 2010. Molecular plant 3(6):1087-1103			Direct	Activator
SND1	RNS3	Protein-DNA	Zhong et al. 2010. Molecular plant 3(6):1087-1103			Direct	Activator
SND1	MC8	Protein-DNA	Zhong et al. 2010. Molecular plant 3(6):1087-1103			Direct	Activator
SND1	MC9	Protein-DNA	Zhong et al. 2010. Molecular plant 3(6):1087-1103			Direct	Activator
SND1	TUA2	Protein-DNA	Zhong et al. 2010. Molecular plant 3(6):1087-1103			Direct	Activator
VND7	XTH10	Protein-DNA	Zhong et al. 2010. Molecular plant 3(6):1087-1103			Direct	Activator
VND7	CTL2	Protein-DNA	Zhong et al. 2010. Molecular plant 3(6):1087-1103			Direct	Activator
VND7	BFN1	Protein-DNA	Zhong et al. 2010. Molecular plant 3(6):1087-1103			Direct	Activator
VND7	CslB1	Protein-DNA	Zhong et al. 2010. Molecular plant 3(6):1087-1103			Direct	Activator
VND7	CslB2	Protein-DNA	Zhong et al. 2010. Molecular plant 3(6):1087-1103			Direct	Activator
VND7	GUS3	Protein-DNA	Zhong et al. 2010. Molecular plant 3(6):1087-1103			Direct	Activator
VND7	IRX10	Protein-DNA	Zhong et al. 2010. Molecular plant 3(6):1087-1103			Direct	Activator
VND7	IRX14-L	Protein-DNA	Zhong et al. 2010. Molecular plant 3(6):1087-1103			Direct	Activator
VND7	MYB55	Protein-DNA	Zhong et al. 2010. Molecular plant 3(6):1087-1103			Direct	Activator
VND7	PARVUS	Protein-DNA	Zhong et al. 2010. Molecular plant 3(6):1087-1103			Direct	Activator
VND7	RNS3	Protein-DNA	Zhong et al. 2010. Molecular plant 3(6):1087-1103			Direct	Activator
VND7	SCPL20	Protein-DNA	Zhong et al. 2010. Molecular plant 3(6):1087-1103			Direct	Activator
VND7	UXS3	Protein-DNA	Zhong et al. 2010. Molecular plant 3(6):1087-1103			Direct	Activator
VND7	UXS6	Protein-DNA	Zhong et al. 2010. Molecular plant 3(6):1087-1103			Direct	Activator
VND7	XND1	Protein-DNA	Zhong et al. 2010. Molecular plant 3(6):1087-1103			Direct	Activator
VND7	XCP1	Protein-DNA	Zhong et al. 2010. Molecular plant 3(6):1087-1103	Yamaguchi et al. 2011. Plant J. 66:579–590		Direct	Activator
VND7	XCP2	Protein-DNA	Zhong et al. 2010. Molecular plant 3(6):1087-1103	Yamaguchi et al. 2011. Plant J. 66:579–590		Direct	Activator
VND7	MC8	Protein-DNA	Zhong et al. 2010. Molecular plant 3(6):1087-1103			Direct	Activator
VND7	MC9	Protein-DNA	Zhong et al. 2010. Molecular plant 3(6):1087-1103	Yamaguchi et al. 2011. Plant J. 66:579–590		Direct	Activator
VND7	BFN1	Protein-DNA	Zhong et al. 2010. Molecular plant 3(6):1087-1103			Direct	Activator
MYB46	MYB43	Protein-DNA	Zhong & Ye. 2012. Plant Cell Physiol. 53(2): 368–380			Direct	Activator
MYB46	MYB58	Protein-DNA	Zhou et al. 2009. Plant Cell. 21:248–266	Zhong & Ye. 2012. Plant Cell Physiol. 53(2): 368–380		Direct	Activator
MYB58	4CL1	Protein-DNA	Zhou et al. 2009. Plant Cell. 21:248–266			Direct	Activator
MYB58	C3H1	Protein-DNA	Zhou et al. 2009. Plant Cell. 21:248–266			Direct	Activator
MYB58	C4H	Protein-DNA	Zhou et al. 2009. Plant Cell. 21:248–266			Direct	Activator
MYB58	CAD6	Protein-DNA	Zhou et al. 2009. Plant Cell. 21:248–266			Direct	Activator
MYB58	CCoAOMT1	Protein-DNA	Zhou et al. 2009. Plant Cell. 21:248–266			Direct	Activator
MYB58	CCR1	Protein-DNA	Zhou et al. 2009. Plant Cell. 21:248–266			Direct	Activator
MYB58	COMT	Protein-DNA	Zhou et al. 2009. Plant Cell. 21:248–266			Direct	Activator
MYB58	HCT	Protein-DNA	Zhou et al. 2009. Plant Cell. 21:248–266			Direct	Activator
MYB58	LAC4	Protein-DNA	Zhou et al. 2009. Plant Cell. 21:248–266			Unknown	Activator
MYB58	MYB46	Protein-DNA	Zhou et al. 2009. Plant Cell. 21:248–266			Unknown	Activator
MYB58	NST2	Protein-DNA	Zhou et al. 2009. Plant Cell. 21:248–266			Unknown	Activator
MYB58	PAL1	Protein-DNA	Zhou et al. 2009. Plant Cell. 21:248–266			Direct	Activator
MYB58	VND6	Protein-DNA	Zhou et al. 2009. Plant Cell. 21:248–266			Unknown	Activator
MYB58	VND7	Protein-DNA	Zhou et al. 2009. Plant Cell. 21:248–266			Unknown	Activator
MYB63	LAC4	Protein-DNA	Zhou et al. 2009. Plant Cell. 21:248–266			Direct	Activator
MYB63	MYB46	Protein-DNA	Zhou et al. 2009. Plant Cell. 21:248–266			Unknown	Activator
MYB63	NST2	Protein-DNA	Zhou et al. 2009. Plant Cell. 21:248–266			Unknown	Activator
MYB63	VND6	Protein-DNA	Zhou et al. 2009. Plant Cell. 21:248–266			Unknown	Activator
MYB63	VND7	Protein-DNA	Zhou et al. 2009. Plant Cell. 21:248–266			Unknown	Activator
MYB63	4CL1	Protein-DNA	Zhou et al 2009; Öhman et al. 2012. Plant J. 73(1):63–76			Direct	Activator
SND1	ASL11	Protein-DNA	Zhong et al. 2010. Molecular plant 3(6):1087-1103			Direct	Activator
SND1	Polygalacturonase, At1G23460	Protein-DNA	Zhong et al. 2010. Molecular plant 3(6):1087-1103			Direct	Activator
SND1	Polygalacturonase, At1G70500	Protein-DNA	Zhong et al. 2010. Molecular plant 3(6):1087-1103			Direct	Activator
MYB4	TT8	Protein-protein	Zimmerman et al. 2004. Plant J. 40:22–34
MYB4	bHLH012	Protein-protein	Zimmerman et al. 2004. Plant J. 40:22–34
KNAT7	MYB5	Protein-protein	Bhargava et al. 2013. Planta 237:1199–1211			Direct
